# Supplementary material
Source: bioRxiv or medRxiv preprint supplement (https://medrxiv.org/highwire/filestream/75044/field_highwire_adjunct_files/0/2020.03.30.20042523-1.pdf)
Supplement: Supplementary file [file 2020.03.30.20042523-1.pdf]

# Appendices

## Annex I: Written consent form

Code No \_\_\_\_\_

Student's full name: \_\_\_\_\_

Title: STUDY ABOUT THE PARASITOSIS PREVALENCE IN THE TOWN OF GHINDAE

First and foremost greetings, we are a group of students from the Asmara college of health sciences. We have come to conduct a study on the prevalence of parasites. This study will target the parasites that cause abdominal discomfort, diarrhoea, nausea, vomiting and abdominal cramps. The results will then be used to determine the overall prevalence of the parasitosis of these organisms in the town of Ghindae.

The problems of these parasites is as mentioned above. In accordance with their transmission schemes, this study will be conducted on elementary and junior school students of Ghindae area. The participants of this study will be required to submit a stool sample and we will take two small drops of blood from the fingers by pricking. The stool sample will be used in the diagnosis of the presence of parasites and the blood drop will be used in assessment of anaemia in the participant student.

Results will be prepared after processing the samples. In this light; for the participants/ students with positive parasitosis and anemia, ways for medical help and fast treatment will be facilitated. The results will be held confidential and report of positive individuals will be notified to concerned parties for proper treatment according to standard guideline for intestinal parasitic infection and anemia.

This study is fully dependent on your consent. After you fully understand the purposes of this study if you are consentious; you are authorizing us to take stool and blood sample from the participant/ student you represent. At the end, if you are not willing to participate in this study we assure you that there will be no consequences whatsoever.

Full name of guardian: \_\_\_\_\_

Relationship with the participant: \_\_\_\_\_

Signature: \_\_\_\_\_ Date: \_\_\_\_\_

Name of the study conductor: \_\_\_\_\_

Signature: \_\_\_\_\_ Date: \_\_\_\_\_

## Appendix II: Questionnaire

The purpose of this questionnaire is to gather data on risk factors for parasitic infection, malnutrition and anemia in school age children in Ghindae subzone. It is conducted with the aim of obtaining information to the research as the partial fulfillment of the requirement for the award of Bachelor of Science of Clinical laboratory sciences. To attain its objective you are kindly requested to give reliable information. The researcher assures you that your response will be confidential and only to be used for the purpose of the study; moreover, when filling this questionnaire you don't need to write your name.

Thank you in advance

Part 1: demographic information

The following questions refer to the child

Sex; Male \_\_\_\_\_ Female \_\_\_\_\_ B. Age: \_\_\_\_\_ years

Height: \_\_\_\_\_ cm D. Weight: \_\_\_\_\_ Kg

1. Do you eat regularly, how many times a day?

A. One meal per day B. two meal per day C. Three and more meal per day

2. Do you wash your hands properly?

A. Yes B. No

3. Do you know the purpose of washing your hands?

A. Yes B. No

4. When do you think you should wash your hands?

A. Before and after eating food B. After playing C. After defecating/urinating D. Other

5. Are his/her fingers clean?

A. Yes B. No

6. Are his/her finger nails trimmed?

A. Yes B. No

7. Where do you defecate when you are at home?

A. Toilet B. River C. Open field D. Farm place E. Other

8. Where do you defecate when you are at school

A. Toilet B. River C. Open field D. Farm place E. Other

9. What kind of shoes do you frequently wear?

A. Flip-flops B. Shida C. Sandals D. Sneakers E. Other

10. What is he/she wearing at the time of interview?

A. Flip-flops B. Shida C. Sandals D. Sneakers E. Other

11. Do you walk bare-footed?

A. Yes B. No

12. If your answer is YES to number 11's question:

Where do you walk bare foot?

A. Farm place B. House compound C. Around a river D. School E. Other \_\_\_\_\_

How frequently do you walk bare foot?

A. When at home B. While playing C. When defecating D. When I go run errands for my family E. Other \_\_\_\_\_

13. Have you ever felt very itchy at your feet sole or your shin?

A. Yes B. No

14. If your answer to number 13's question is YES;

Describe the distribution of the itch;

A. Intensely at one area B. It covered a large area C. Don't remember D. Other\_\_\_\_\_

15. Have you ever encountered small insect looking parasites in your stool?

A. Yes B. No

Second questionnaire: The following questions refer to the Guardian

A. *Questions about the student*

1. Has your child been sick (stomach ache) within the past month?

A. Yes B. No

2. If your answer to number 1's question is YES;

Which of the following describes the sickness best?

A. Diarrhea B. Bloating C. Vomiting and nausea D. Other\_\_\_\_\_

What kind of stool did you observe when he/she got sick?

A. Constipated B. Non bloody diarrhea C. Bloody diarrhea D. Other\_\_\_\_\_

Regarding these conditions has your child being medicated?

A. Yes B. No

If your answer is YES when was the time of medication?

A. Still being medicated B. Finished within the past two weeks C. Finished before the past two weeks

Where was your child medicated?

A. Government's health center B. Private clinic C. Pharmacy D. Traditional healers

B. *Questions about the family*

1. Family size: \_\_\_\_\_

2. Educational status :

Mother : A. Illiterate B. Read and write C. Elementary D. Junior E. Secondary F. Higher education

Father : A. Illiterate B. Read and write C. Elementary D. Junior E. Secondary F. Higher education

3. Ethnicity: A. Tigrinya B. Tigre C. Saho D. Other\_\_\_\_\_

4. Religion: A. Muslim B. Orthodox C. Catholic D. Protestant E. Other\_\_\_\_\_

5. Mother's age: \_\_\_\_\_

6. Current occupation of father

A. Farmer B. Trader C. Government job D. National service E. Daily laborer F. Other\_\_\_\_\_

7. Current occupation of mother

A. Farmer B. Trader C. Government job D. National service E. Daily laborer F. Other\_\_\_\_\_

8. If the parents occupation is Farmer:

Does the child help/engage in any farming activities?

A. Yes B. No

What type of fertilizers do you use?

A. Human waste/stool B. Eiba (Manure, i.e., cow dung) C. Man made D. Other\_

9. Where do you live?

A. Zone 1 B. Zone 2 C. Zone 3 D. Other\_\_\_\_\_

10. Do you have a toilet at home?

A. Yes B. No

11. If your answer to number 10's question is YES:

11.1 What type of toilet do you have?

A. Traditional (Not flushable) B. Modern (Flushable)

11.2 Who uses the toilet?

A. One family B. More than one family

11.3 How frequent do you use the toilet when at home?

A. Always B. Sometimes C. We don't use it at all

12. Where do you get drinking water from?

A. Spring B. Pond C. River D. Tap water E. Water tank trucks (Bot) F. Other\_\_\_\_\_

13. Where do you put the water for drinking?

A. Eitro (Clay reservoir) B. Jericans C. Fisto D. Other\_\_\_\_\_

14. Does your water reservoir has covering? A. Yes B. No

15. How do you use drinking water?

A. Boiling B. Chlorine treatment C. Use of sheb (Chloride silica stone) D. Filtration  
E. Direct F. Other\_\_\_\_\_

16. Where do you wash your clothes?

A. By river side B. At home C. At pond D. Other\_\_\_\_\_

17. How do you dispose household wastes?

A. Bury underground B. incinerated C. Open field D. Thrown in the river E. Other\_\_\_\_\_

18. What type of soil is the student house playground or compound?

A. Sandy B. Dusty/Clay soil C. Full of grass D. Other\_\_\_\_\_

19. Does the student practice religious fasting?

A. Yes B. No

20. Does your child had any soil eating behavior (Pica) when he was little?

A. Yes B. No

21. What type of activities does your child dwell at home?

A. Farming B. Fetching Water C. Home activities D. Other\_\_\_\_\_

22. How frequently do you eat uncooked vegetable?

A. Less than Once per week B. 1-2 /week C. 3-5 /week D. More than 5times /week

23. How frequently do you eat cooked vegetables at home?

A. Less than Once per week B. 1-2 /week C. 3-5 /week D. More than 5 times /week

24. How frequently do you consume milk and its products at home?

A. Less than Once per week B. 1-2 /week C. 3-5 /week D. More than 5 times /week

25. How frequently do you eat meat at home?

A. Less than Once per week B. 1-2 /week C. 3-5 /week D. More than 5 times /week

26. How frequently do you eat fruits at home?

A. Less than Once per week B. 1-2 /week C. 3-5 /week D. More than 5 times /week

27. What kind house floor do you have?

a. unfinished soil b. Cemented c. Tiled

28. Do you have garden at home? A. Yes B. No

29. If you answered YES: Does your child help in the garden? A. Yes B. No

30. Does the student defecate around the farm place?

A. Yes B. No

31. If you are willing, what is your phone number? \_\_\_\_\_

32. Marital status of the parents:

A. Together B. Divorced C. Widowers D. Not living together

33. What is your average income per month? \_\_\_\_\_

Appendix III: Questionnaire Tigrigna Version

ናይ ስምምዕ ቅጥፂ

ኮድ: \_\_\_\_\_

ምሉእ ስም ተመሃራይ/ሪት: \_\_\_\_\_

አርእስቲ: መጽናዕቲ ዝርግሐ ባልዓት መጻናጡን ዋሕዲ ደምን ኣብ ከተማ ጊንዳዕ

ሰላምታና ብምቕዳም ንሕና ተመሃሮ ኮሌጅ ጥዕና ኣስመራ ዝኾንና ጉጅለ መጽናዕቲ ንምክያድ መጸእና ኣለና። እዚ መጽናዕቲ እዚ ነቶም ቃንዛ ናይ መጻናጥ ፣ ከም ውጽኢት፣ ቕርጻት፣ መንፋሕቲ፣ ዕግርዕርን ተምላሰን ዘሰዕቡ ባልዓት ንምርካብ ብኣኡ ጌርካ ድማ ዝርግሐ ናይ መጻናጥን ከሰፀን ጸገማት ኣብ ከተማ ጊንዳዕ ንምርዳእ ዝዓለመ እዩ።

ጸገማት እዞም ባልዓት እዚ ዝተጠቐሰ ኮይኑ ናቶም ናይ ምትሕልላፍ ኣገባባትን ዝርከቡሉ ኩነታት ኣየርን ብምምርኳስ እዚ መጽናዕቲ ኣብ ተመሃሮ መባእታን ማእከላይ ደረጃን ከተማ ጊንዳዕ ክካየድ እዩ። በዚ ምክንያት ነዚ መጽናዕቲ ንምስታፍ ኣትዮም ካብ ዘለዉ ተመሃሮ ቅምሶታት(sample) ቀልቀልን ደምን ክንወስድ ኢና። እታ ንእሽቶ ቀልቀል ህላወ ባልዓት ንምንጻር እተን ዝውሰዳ ክልተ ነጥቢ ደም ድማ እቲ/ታ ተመሃራይ/ሪት ዋሕዲ-ደም ኣለዎ/ዎ'ዶ ዩብሉ-ን/ላን ንምምርጫ ክጠቕማና እየን።

ውጽኢት እዚ መጽናዕቲ ድሕሪ መርመራ ክዳሎ እዩ። በዚ መሰረት ነቶም ኣብ ቀልቀሎም ተሃዋሲያን፣ ብናይ ደም መርመራ ድማ ዋሕዲ-ደም ከምዘለዎም ዝተረኽቡ ተመሃሮ ብቕልጡፍ ሕክምናዊ ሓገዝ ዝረኽቡሉ መንገድታት ክናደየሎም እዩ። ኣብዚ ክጥቀስ ዝግብኦ ውጽኢት መርመራ ብምስጢር ከምዝተሓዘን ውልቃዊ መንነት ናይ ተሳተፍቲ ንዝኾነ ይኹን ዘይግብኦ ኣካል ከምዘይግለጽን ነረጋግጻልኩም።

ዕላማ ናይ እዚ መጽናዕቲ ከምዚ ዝተጠቐሰ ኮይኑ ብዘይናትኩም/ክን ድልየትን ርድየትን ስለዘይካየድ ንሰኹም/ኸን ነዚ መጽናዕቲ ንምክያድ ድሉዎት ክትኮኑ/ና ንኣተኩም። ስለዚ ንኩሉ ተጠቂሱ ዘሎ ተረዲእኩም/ክን ብፍታውኩም/ክን ተቐቢልኩም/ክን ኣምህላውኩም/ክን ብተወሳኺ ነቲ ዝተባህለ ቅምሶታት ካብቲ ብሞግዚትነት ዝውከል ተመሃራይ ክውሰድ ፍቃደኛታት ምዃንኩም/ክን ብክታምኩም ከተረጋግጹልና/ጸልና ንኣትት። ኣብ መውዳእታ ነዚ መጽናዕቲ ንምስታፍ ፍቓደኛ ዘይምዃን ዝኾነ ይኹን ጸገም ከምዘይምጽእ ክንሕብር ንፈቲ።

ምሉእ ስም ሞግዚት: \_\_\_\_\_

ዝምድና ምስ ተመሃራይ: \_\_\_\_\_

ክታም: \_\_\_\_\_ ዕለት: \_\_\_\_\_

ስም ኣባል መጽናዕታዊ ጉጅለ: \_\_\_\_\_

ክታም: \_\_\_\_\_ ዕለት: \_\_\_\_\_

**ንተማራይ ዝምልከት፡**

|                                                                    |                                                                                                                                                 |                                                                     |
|--------------------------------------------------------------------|-------------------------------------------------------------------------------------------------------------------------------------------------|---------------------------------------------------------------------|
| 1.ኮድ                                                               |                                                                                                                                                 |                                                                     |
| 2.ጾታ                                                               | ___ ተባ                                                                                                                                          | ___ አን                                                              |
| 3.ዕድሜ                                                              | ዓመት                                                                                                                                             |                                                                     |
| 4. ክፍል                                                             |                                                                                                                                                 |                                                                     |
| 5. ስም ቤት-ትምህርቲ                                                     |                                                                                                                                                 |                                                                     |
| 6.ክብደት፡                                                            | ኪሎግራም                                                                                                                                           |                                                                     |
| 7.ቁመት፡                                                             | ሴንትሜትር                                                                                                                                          |                                                                     |
| 9.አብ መዓልት ክንደይ ጊዜ ብገምጋም ትምገብ/ቢ?                                    | ሀ. 1 ጊዜ ለ. 2 ጊዜ ሐ. 3 ጊዜ መ. ልዕሊ 3 ጊዜ                                                                                                             |                                                                     |
| 10.አእዳውካ ብግቡእ ትሕጹብ ዶ?                                              | ሀ. እወ ለ. አይፋል                                                                                                                                   |                                                                     |
| 11.ጥቕሚ ኢድካ ምሕጻብ ትፈልጦ/ትፈልጥዮ ዶ?                                      | ሀ. እወ ለ. አይፋል                                                                                                                                   |                                                                     |
| 12.መዓስ ኢድካ/ኪ ክትሕጹብ/ቢ ይግብካ/ኪ?                                       | ሀ. ቅድምን ድሕርን መግቢ ምብላዕ ለ. ድሕሪ ጸወታ ሐ. ድሕሪ ቀልቀል ምውጻእ መ. ካልእ፡ _____                                                                                 |                                                                     |
| 13.አጻብዕቲ/ታ ጽሩይ ኣሎ 'ዶ?                                              | ሀ. እወ ለ. አይፋል                                                                                                                                   |                                                                     |
| 14.አጽፋሩ/ራ ተቐሪጹ ኣሎ 'ዶ?                                              | ሀ. እወ ለ. አይፋል                                                                                                                                   |                                                                     |
| 15.አብ ገዛ አብ ዝሃለኻሉ ቀልቀል ኣበይ ትወጽእ ?                                  | ሀ. ዓይኒ-ምድሪ ለ. ሩባ ሐ. ጎልጎል መ. ሕርሻ ረ. ካልእ፡ _____                                                                                                   |                                                                     |
| 16.አብ ቤ/ት አብ ዝሃለኻሉ ቀልቀል ኣበይ ትወጽእ?                                  | ሀ. ዓይኒ-ምድሪ ለ. ሩባ ሐ. ጎልጎል መ. ሕርሻ ረ. ካልእ፡ _____                                                                                                   |                                                                     |
| 17.ብብዝሐ እትወድዮ ሳእኒ እንታይ እዩ?                                         | ሀ. ሸቦጥ ለ. ሸዳ/ኮንጎ ሐ. ሰንደል መ. ሕቲም-ሳእኒ ረ. ካልእ፡ _____                                                                                               |                                                                     |
| 18.አብታ እዋን ወድዩዎ ዘሎ ዓይነት ሳእኒ?                                       | ሀ. ሸቦጥ ለ. ሸዳ/ኮንጎ ሐ. ሰንደል መ. ሕቲም-ሳእኒ ረ. ካልእ፡ _____                                                                                               |                                                                     |
| 19. ጥራይ እግርኻ ትኸይድ/ትኸዲ 'ዶ ?                                         | ሀ. እወ ለ. አይፋል                                                                                                                                   |                                                                     |
| 20                                                                 | .መልሰኻ/ኺ ንቁጽሪ 19 ሕቶ እወ እንተኾይኑ ፣ መዓልታዊ መዓስ መዓስ ጊዜ ጥራይ እግርኻ/ኺ ትኸይድ/ትኸዲ?                                                                            | ሀ. አብ ገዛ ዘለኹሉ ለ. አብ ዝጸወተሉ ሐ. ቀልቀል አብ ዝወጸሉ መ. አብ ዝለኻኹሉ ረ. ካልእ፡ _____ |
|                                                                    | ኣበይ ቦታ ጥራይ እግርኻ/ርኺ ትኸይድ/ትኸዲ ?                                                                                                                   | ሀ. ግራት(ቦታ-ሕርሻ) ለ. ቀጽራ-ገዛ ሐ. ከባቢ ወሓይዝ መ. ቤት-ትምህርቲ ረ. ካልእ፡ _____      |
| 21. አብ እግርኻ/ኺ ብፍላይ ከብዲ እግርን በራቕቶን ሱሓ ተሰሚዑካ/ኪ ይፈልጥ'ዶ?               | ሀ. እወ ለ. አይፋል                                                                                                                                   |                                                                     |
| 22. መልሰኻ ንሕቶ ቁጽሪ 21 እወ እንተኾይኑ፡ ዝርግሐ ናይ'ቲ ሱሓ ከመይ ኔሩ?                | ሀ. አብ ሓንቲ ቦታ ለ. ገፊሕ ቦታ ዝሸፍን ሐ. አይዝክርን እዩ ረ. ካልእ፡ _____                                                                                          |                                                                     |
| 23. አብ ቀልቀልካ ደቀቕቲ ሓሰኻ መሳሊ ዝኾነ ነገር ተዓዚብካ ትፈልጥ'ዶ?                    | ሀ. እወ ለ. አይፋል                                                                                                                                   |                                                                     |
| <b>ንወሰዲ ዝምልከት ሕቶታት ቍብ ዝሓለፈ ወርሒ እቲ/ታ ህጻን ከብዱ/ዳ ሓሚሙ/ማ ይ/ትፈልጥ 'ዶ?</b> |                                                                                                                                                 | ሀ. እወ ለ. አይፋል                                                       |
| 1. መልሰኻ/ኺ ንቁጽሪ 1 እወ እንተኾይኑ፡ ካብዞም ዝሰዕሱ ኣየናይ ብዝበለጸ ነቲ ሕግም ይገልጻ?      | ሀ. ውጽኣት ለ. መንፋሕቲ ሐ. ዕግርግርን ተምላሰን መ. ካልእ፡ _____                                                                                                  |                                                                     |
| 2. ካብ'ዞም ዝሰዕሱ እንታይ ዓይነት ቀልቀል ኣጋጢምዎ/ዎ ይፈልጥ?                         | ሀ. ድርቀት ዘሎዎ ለ. ደም ዘይብሉ ውጽኣት ሐ. ደም ዘለዎ ውጽኣት መ. ካልእ፡ _____                                                                                        |                                                                     |
| 3. ነዚ ጸገማት ብዝተሓሓዘ ተሓኪሙ/ማ ይ/ትፈልጥ 'ዶ?                                | ሀ. እወ ለ. አይፋል                                                                                                                                   |                                                                     |
| 4. ንቁጽሪ 3 ሕቶ መልሰኻ/ኺ እወ እንተኾይኑ፡ ዝተሓከመሉ ጊዜ መዓስ እዩ?                   | ሀ. ሕጂ ይ/ትሕከም ኣሎ/ላ ለ. አብ ውሽጢ ዝሓለፈ ክልተ ሰሙናት ወዲኡ/ኣ ሐ. ቅድሚ ክልተ ሰሙን ወዲኡ/ኣ ዝተሓከመሉ-ቦታ ኣበይ እዩ ? ሀ. መንግስታዊ ማእከል ጥዕና ለ. ናይ ግሊ ክለኒክ ሐ. ፋርማሲ መ. ባህላውያን ፈወሰቲ |                                                                     |
| ዓቕን ሄምግሎቢን፡                                                        | ግ/ዴሊ                                                                                                                                            |                                                                     |

|                                                       |                                 |                                                                          |                                  |
|-------------------------------------------------------|---------------------------------|--------------------------------------------------------------------------|----------------------------------|
| ንወለዲ ዝምልከት፡                                           |                                 |                                                                          |                                  |
| 1. ዓኛን ስድራቤትኩም(ብዝሒ ኣባላት ስድራ)፡                         |                                 |                                                                          |                                  |
| 2. ደረጃ ትምህርቲ                                          | አቦ                              | ሀ. መሃይም ለ. ምጽሓፍን ምንባብን                                                   | ሐ. መባእታ መ. ማእከላይ ረ. ካልኣይ ሰ. ልዕሊኡ |
|                                                       | አደ                              | ሀ. መሃይም ለ. ምጽሓፍን ምንባብን                                                   | ሐ. መባእታ መ. ማእከላይ ረ. ካልኣይ ሰ. ልዕሊኡ |
| 3. ብሄር፡                                               |                                 | ሀ. ትግርኛ ለ. ትግረ ሐ. ሳሆ መ. ካልኣ፡ _____                                       |                                  |
| 4. ሃይማኖት፡                                             |                                 | ሀ. ምስልምና ለ. ተዋህዶ ሐ. ካቶሊክ መ. ክንሻ ረ. ካልኣ፡ _____                            |                                  |
| 5. ዕድመ ኣደ                                             |                                 | ዓመት _____                                                                |                                  |
| 6. ህሉው ስራሕ ኣቦ                                         |                                 | ሀ. ሓረስታይ ለ. ነጋዳይ ሐ. መንግስታዊ ስራሕ መ. ኣገልግሎት ረ. ናይ-ጉልበት-ስራሕ ሰ. ካልኣ _____     |                                  |
| 7. ህሉው ስራሕ ኣደ                                         |                                 | ሀ. በዓልቲ-ኣዳር ለ. ነጋዳይ ሐ. መንግስታዊ ስራሕ መ. ሓረስታይ ረ. ካልኣ _____                  |                                  |
| 8. ስራሕ ወላዲ/ት ሓረስታይ እንተ-ኾይኑ፡ እቲ/ታ ህጻን ኣብ ሕርሻ ይሕግዝ 'ዶ ? |                                 | ሀ. እወ ለ. ኣይፋል                                                            |                                  |
| 9. እንታይ ዓይነት ድኻሜ ትጥቀሙ?                                |                                 | ሀ. ቀልቀል ሰብ ለ. ዲባ(ቀልቀልኩብቲ) ሐ. ሰብ ሰርሐ መ. ካልኣ _____                         |                                  |
| 10. መንበሪ ቦታ(ምምሕዳር ከባቢ)                                |                                 | ሀ. ዞባ 1 ለ. ዞባ 2 ሐ. ዞባ 3 መ. ካልኣ _____ [ ዝውቲ፡ _____ ]                      |                                  |
| 11. ኣብ ዝኾኑም/ኻን ዓይነ-ምድራ ኣለኩም'ዶ?                        |                                 | ሀ. እወ ለ. ኣይፋል                                                            |                                  |
| X                                                     | እወ እንተ-ኾይኑ፡ እንታይ ዓይነት ዓይነት ምድራ? | ሀ. ባህላዊ [ማይ ዘይፈሰ] ለ. ዘመናዊ [ማይ ዘይፈሰ]                                      |                                  |
| X                                                     | ነቲ ዓይነ-ምድራ መን ይጥቀሙሉ?            | ሀ. ሓንቲ ስድራ ለ. ካብ ሓንቲ ስድራ ንላዕሊ                                            |                                  |
| X                                                     | ተጠቃምነት ዓይነ-ምድራ ኣብ ዝኾኑም          | ሀ. ኩሉ ግዜ ለ. ሓንሳብ ሓንሳብ ሐ. ኣይንጥቀምን ኢና                                      |                                  |
| 12. እትሰትይዎ ማይ ካበይ ይመጽእ?                               |                                 | ሀ. ፈልፋሊ ለ. ራህያ ሐ. ሩባ መ. ቡምባ ረ. ቦጥ ሰ. ካልኣ _____                           |                                  |
| 13. ንኻሕተ ዝመጸ ማይ ኣበይ ተቐምጥዎ?                            |                                 | ሀ. ዕትሮ ለ. ጀሪካን ሐ. ፊሰቶ መ. ካልኣ                                             |                                  |
| 14. ዝህ መቐመጫ ማይ መኻደኒ ኣለዎ'ዶ?                            |                                 | ሀ. እወ ለ. ኣይፋል                                                            |                                  |
| 15. ነቲ እትሰትይዎ ማይ ብኸመይ ትጥቀሙሉ?                          |                                 | ሀ. ይፈልሕ ለ. ክሎሪን ይኣትዎ ሐ. ሽብ ይኣትዎ<br>ሐ. ይዘፈፍ/ይዘቆቆ መ. ዝኾነ ነገር ኣይግበረሉን _____ |                                  |
| 16. ክዳውንቲ ኣበይ ትሓጽቡ?                                   |                                 | ሀ. ዋቻ ወሓይዝ ለ. ገዛ ሐ. ከባቢ ራህያ መ. ካልኣ _____                                 |                                  |
| 17. ናይ ዝኾኑም ንሓፍ ኣበይ ይጎሓፍ?                             |                                 | ሀ. ኣብ ጉድጓድ ይድፈን ለ. ይቃጸል ሐ. ቃልዕ ቦታ መ. ሩባ ይውሰድ ረ. ካልኣ _____                |                                  |
| 18. ህጻናት ኣብ ከባቢ ዝዛ ዝጸወትሉ ቦታ እንታይ ዓይነት ሓመድ ኣለዎ?        |                                 | ሀ. ሑጻ ለ. ድኽም-ሓምድ ሐ. ሳዕሪ ዝበዝሐ መ. ካልኣ                                      |                                  |
| 19. እዚ/ዛ ተመሃራይ/ሪት ይጸውም'ዶ/ ትጸውም'ዶ?                     |                                 | ሀ. እወ ለ. ኣይፋል                                                            |                                  |
| 20. እዚ/ዛ ተመሃራይ/ሪት ሓመድ ናይ ምብላዕ ልምድ ኔርዎ/ዋ'ዶ?            |                                 | ሀ. እወ ለ. ኣይፋል                                                            |                                  |
| 21. እዚ/ዛ ህጻን ኣብ ገዛ እንታይ ንጥፈታት ይሕግዝ/ትሕግዝ?              |                                 | ሀ. ሕርሻ ለ. ማይ-ምውራድ መ. ስራሕ ገዛ ረ. ካልኣ _____                                 |                                  |
| 22. ዘይበሰሉ ኣሕምልቲ ናይ ምብላዕ ልምድ ኣብ ስድራቤት?                 |                                 | ሀ. ትሕቲ 1 ግዜ ለ. 1-2 ግዜ ሐ. 3-5 ግዜ መ. ልዕሊ 5 ግዜ                              |                                  |
| 23. ኣሕምልቲ ናይ ምብላዕ ልምድ ኣብ ስድራቤት?                       |                                 | ሀ. ትሕቲ 1 ግዜ ለ. 1-2 ግዜ ሐ. 3-5 ግዜ መ. ልዕሊ 5 ግዜ                              |                                  |
| 24. ጸባን ውጽኢቲ ናይ ምምጋብ ልምድ ኣብ ስድራቤት?                    |                                 | ሀ. ትሕቲ 1 ግዜ ለ. 1-2 ግዜ ሐ. 3-5 ግዜ መ. ልዕሊ 5 ግዜ                              |                                  |
| 25. ስጋ ናይ ምምጋብ ልምድ ኣብ ስድራቤት?                          |                                 | ሀ. ትሕቲ 1 ግዜ ለ. 1-2 ግዜ ሐ. 3-5 ግዜ መ. ልዕሊ 5 ግዜ                              |                                  |
| 26. ፍሩታታት ናይ ምምጋብ ልምድ ኣብ ስድራቤት?                       |                                 | ሀ. ትሕቲ 1 ግዜ ለ. 1-2 ግዜ ሐ. 3-5 ግዜ መ. ልዕሊ 5 ግዜ                              |                                  |
| 27. ባይታ ቀጽሪ ዝኾኑም ከመይ እዩ?                              |                                 | ሀ. ሓመድ ለ. ሰሚንቶ ሐ. ማቶኔላ መ. ካልኣ፡ _____                                     |                                  |
| 28. ኣብ ከባቢ ዝዛ ጀርዲን ኣለኩም 'ዶ?                           |                                 | ሀ. እወ ለ. ኣይፋል                                                            |                                  |
| 29. እወ እንተ-ኾይኑ እቲ መልሲ፡ እቲ/ታ ህጻን ኣብቲ ጀርዲን ይሕግዝ'ዶ?      |                                 | ሀ. እወ ለ. ኣይፋል                                                            |                                  |
| 30. ኣብቲ ግራት/ቦታ ሕርሻ ትሸኑዶ?                              |                                 | ሀ. እወ ለ. ኣይፋል                                                            |                                  |
| 31. ፍቓድኩም እንተ-ኾይኑ ቁጽሪ ስልኪ፡                            |                                 | _____                                                                    |                                  |
| 32. ኩነታት ኣቦን ኣደን                                      |                                 | ሀ. ብሓንሳብ ኣለዉ ለ. ፍቲሓት ሐ. ምእምንና መ. ብሓንሳብ የለዉን                              |                                  |
| 33. ወርሓዊ እቶት ናይ ስድራቤት                                 |                                 | ናኽፋ                                                                      |                                  |

**Macroscopic Examination**

|    |                            |                                                                                             |                                                                                           |                                                                                            |                                                                                               |
|----|----------------------------|---------------------------------------------------------------------------------------------|-------------------------------------------------------------------------------------------|--------------------------------------------------------------------------------------------|-----------------------------------------------------------------------------------------------|
| 1. | Stool quantity sufficiency | Yes: ___                                                                                    | No: ___                                                                                   |                                                                                            |                                                                                               |
| 2. | Consistency                | a.  Formed | b.  Soft | c.  Loose | d.  Watery |
| 3. | Presence of Mucous         | Yes:___                                                                                     | No:___                                                                                    |                                                                                            |                                                                                               |
| 4. | Presence of Blood          | Yes:___                                                                                     | No: ___                                                                                   |                                                                                            |                                                                                               |

**Microscopic examination**

Name of 1<sup>st</sup> Technician: \_\_\_\_\_

| Parasites               | Presence |         | Intensity |
|-------------------------|----------|---------|-----------|
| Hookworm                | Yes:___  | No:___  |           |
| <b>Other parasites</b>  |          |         |           |
| Amoeba                  | Yes: ___ | No: ___ |           |
| Giardia                 | Yes: ___ | No: ___ |           |
| Enterobius vermicularis | Yes: ___ | No: ___ |           |
| Trichuris trichuria     | Yes: ___ | No: ___ |           |
| Ascaris lambriocoides   | Yes: ___ | No: ___ |           |
| Tanea                   | Yes: ___ | No: ___ |           |
| Hymenolepis nana        | Yes: ___ | No: ___ |           |
| Schistosoma mansoni     | Yes: ___ | No: ___ |           |

Name of 2<sup>nd</sup> Technician: \_\_\_\_\_

|                        |                         | Presence |         | Intensity |
|------------------------|-------------------------|----------|---------|-----------|
| x                      | Hookworm                | Yes:___  | No:___  |           |
| <b>Other parasites</b> |                         |          |         |           |
|                        | Amoeba                  | Yes: ___ | No: ___ |           |
|                        | Giardia                 | Yes: ___ | No: ___ |           |
|                        | Enterobius vermicularis | Yes: ___ | No: ___ |           |
|                        | Trichuris trichuria     | Yes: ___ | No: ___ |           |
|                        | Ascaris lambriocoides   | Yes: ___ | No: ___ |           |
|                        | Tanea                   | Yes: ___ | No: ___ |           |
|                        | Hymenolepis nana        | Yes: ___ | No: ___ |           |
|                        | Schistosoma mansoni     | Yes: ___ | No: ___ |           |
